# Supplementary material for: Estimates of reference evapotranspiration using empirical equations for a northern area of Peru and northern Amazonas
Source: Research Square preprint supplement (doi:10.21203/rs.3.rs-6750174/v1), 2025-06-02
Supplement: Supplementary file 1 [file ab51dcf7980f9581e3bf9dd7.docx]

**Highlights**

- New: First application of the analysis of five mathematical models, the Hargreaves-Samani method (relative humidity and temperature), would be more valid for determining the water requirements of agricultural crops in the area (Bagua, Peru), addressing unique challenges such as high water deficiency (924.0 mm/year).
- Key Finding: Validation of the analyzed methods against the Type "A" Pan Evaporimeter as a reference. The Hargreaves HR method (Relative Humidity and Temperature) is recommended for the Bagua area because it generates acceptable accuracy for estimating reference evapotranspiration in daily periods. Furthermore, the Hargreaves method has shown good performance in semi-arid areas.
- Environmental Impact: Evaluation of the mathematical model that determines the most accurate reference evapotranspiration (ETo) in a region, thus achieving better management of water resources and irrigation, as is the case in Bagua.
- Practical overview: This study shows the general process of ETo estimation, so it is recommended to implement future research in other regions of Peru, considering expanding the number of meteorological stations with different locations.
